# Supplementary material
Source: PubMed Central journal article supplement (PMC5776735)
Supplement: NIHMS926203-supplement-310978_Figure_Reprint_Permissions.pdf [file NIHMS926203-supplement-310978_Figure_Reprint_Permissions.pdf]

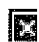

Figure 2

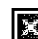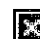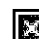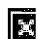

Title: Functional and Biochemical Analysis of Angiotensin II-Forming Pathways in the Human Heart

Logged in as:  
Louis Dell'Italia  
University of Alabama  
at Birmingham

Author: Arlene Wolny, Jean-Paul Clozel, Josiane Rein, Paul Mory, Paul Vogt, Marko Turino, Wolfgang Kiowski, Walter Fischli

Publication: Circulation Research

Publisher: Wolters Kluwer Health, Inc.

Date: Feb 1, 1997

Copyright © 1997, American Heart Association, Inc.

Order Completed

Thank you for your order.

This Agreement between University of Alabama at Birmingham -- Louis Dell'Italia ("You") and Wolters Kluwer Health, Inc. ("Wolters Kluwer Health, Inc.") consists of your license details and the terms and conditions provided by Wolters Kluwer Health, Inc. and Copyright Clearance Center.

Your confirmation email will contain your order number for future reference.

[Printable details.](#)

|                                           |                                                                                                                          |
|-------------------------------------------|--------------------------------------------------------------------------------------------------------------------------|
| License Number                            | 4178240997775                                                                                                            |
| License date                              | Aug 29, 2017                                                                                                             |
| Licensed Content Publisher                | Wolters Kluwer Health, Inc.                                                                                              |
| Licensed Content Publication              | Circulation Research                                                                                                     |
| Licensed Content Title                    | Functional and Biochemical Analysis of Angiotensin II-<br>Forming Pathways in the Human Heart                            |
| Licensed Content Author                   | Arlene Wolny, Jean-Paul Clozel, Josiane Rein, Paul<br>Mory, Paul Vogt, Marko Turino, Wolfgang Kiowski, Walter<br>Fischli |
| Licensed Content Date                     | Feb 1, 1997                                                                                                              |
| Licensed Content Volume                   | 80                                                                                                                       |
| Licensed Content Issue                    | 2                                                                                                                        |
| Type of Use                               | Journal/Magazine                                                                                                         |
| Requestor type                            | Academic/Educational                                                                                                     |
| Sponsorship                               | No Sponsorship                                                                                                           |
| Format                                    | Print and electronic                                                                                                     |
| Portion                                   | Figures/table/illustration                                                                                               |
| Number of<br>figures/tables/illustrations | 1                                                                                                                        |
| Figures/tables/illustrations used         | Figure 6                                                                                                                 |

|                                       |                                                                                                                                                        |
|---------------------------------------|--------------------------------------------------------------------------------------------------------------------------------------------------------|
| Author of this Wolters Kluwer article | Yes                                                                                                                                                    |
| Will you be translating?              | No                                                                                                                                                     |
| Title of the content                  | Multifunctional Role of Chymase in Acute and Chronic Tissue Injury and Remodeling                                                                      |
| Publication the new content is in     | Circulation Research                                                                                                                                   |
| Publisher of your content             | American Heart Association                                                                                                                             |
| Author of the content                 | Dell'Italia                                                                                                                                            |
| Expected publication date             | Jan 2018                                                                                                                                               |
| Estimated size of content (pages)     | 20                                                                                                                                                     |
| Requestor Location                    | University of Alabama at Birmingham<br>901 19th Street South<br><br>BIRMINGHAM, AL 35294<br>United States<br>Attn: University of Alabama at Birmingham |
| Publisher Tax ID                      | 13-2932696                                                                                                                                             |
| Billing Type                          | Invoice                                                                                                                                                |
| Billing address                       | University of Alabama at Birmingham<br>901 19th Street South<br><br>BIRMINGHAM, AL 35294<br>United States<br>Attn: University of Alabama at Birmingham |

Total 0.00 USD

[ORDER MORE](#) [CLOSE WINDOW](#)

Copyright © 2017 [Copyright Clearance Center, Inc.](#) All Rights Reserved. [Privacy statement.](#)  
[Terms and Conditions.](#)

Comments? We would like to hear from you. E-mail us at [customercare@copyright.com](mailto:customercare@copyright.com)

Figure 3

**WOLTERS KLUWER HEALTH, INC. LICENSE  
TERMS AND CONDITIONS**

Oct 09, 2017

This Agreement between University of Alabama at Birmingham -- Louis Dell'Italia ("You") and Wolters Kluwer Health, Inc. ("Wolters Kluwer Health, Inc.") consists of your license details and the terms and conditions provided by Wolters Kluwer Health, Inc. and Copyright Clearance Center.

|                                        |                                                                                                                          |
|----------------------------------------|--------------------------------------------------------------------------------------------------------------------------|
| License Number                         | 4180211365070                                                                                                            |
| License date                           | Sep 01, 2017                                                                                                             |
| Licensed Content Publisher             | Wolters Kluwer Health, Inc.                                                                                              |
| Licensed Content Publication           | Circulation                                                                                                              |
| Licensed Content Title                 | Advanced Glycation End Products Activate a Chymase-Dependent Angiotensin II-Generating Pathway in Diabetic Complications |
| Licensed Content Author                | Vijay Koka, Wansheng Wang, Xiao Ru Huang, Shokei Kim-Mitsuyama, Luan D. Truong, Hui Y. Lan                               |
| Licensed Content Date                  | Mar 14, 2006                                                                                                             |
| Licensed Content Volume                | 113                                                                                                                      |
| Licensed Content Issue                 | 10                                                                                                                       |
| Type of Use                            | Journal/Magazine                                                                                                         |
| Requestor type                         | Academic/Educational                                                                                                     |
| Sponsorship                            | No Sponsorship                                                                                                           |
| Format                                 | Print and electronic                                                                                                     |
| Portion                                | Figures/table/illustration                                                                                               |
| Number of figures/tables/illustrations | 1                                                                                                                        |
| Figures/tables/illustrations used      | Figure 2                                                                                                                 |
| Author of this Wolters Kluwer article  | Yes                                                                                                                      |
| Will you be translating?               | No                                                                                                                       |
| Title of the content                   | Multifunctional Role of Chymase in Acute and Chronic Tissue Injury and Remodeling                                        |
| Publication the new content is in      | Circulation Research                                                                                                     |
| Publisher of your content              | American Heart Association                                                                                               |
| Author of the content                  | Dell'Italia                                                                                                              |
| Expected publication date              | Jan 2018                                                                                                                 |
| Estimated size of content (pages)      | 20                                                                                                                       |
| Requestor Location                     | University of Alabama at Birmingham<br>901 19th Street South                                                             |

BIRMINGHAM, AL 35294  
 United States  
 Attn: University of Alabama at Birmingham

Publisher Tax ID 13-2932696

Billing Type Invoice

Billing Address University of Alabama at Birmingham  
 901 19th Street South

BIRMINGHAM, AL 35294  
 United States  
 Attn: University of Alabama at Birmingham

Total 0.00 USD

Terms and Conditions

### **Wolters Kluwer Terms and Conditions**

1. **Transfer of License:** Wolters Kluwer hereby grants you a non-exclusive license to reproduce this material for this purpose, and for no other use, subject to the conditions herein.
2. **Credit Line:** will be prominently placed and include: For books – the author(s), title of book, editor, copyright holder, year of publication; For journals – the author(s), title of article, title of journal, volume number, issue number, inclusive pages and website URL to the journal page.
3. **Warranties:** The requestor warrants that the material shall not be used in any manner which may be considered derogatory to the title, content, or authors of the material, or to Wolters Kluwer.
4. **Indemnity:** You hereby indemnify and hold harmless Wolters Kluwer and their respective officers, directors, employees and agents, from and against any and all claims, costs, proceeding or demands arising out of your unauthorized use of the Licensed Material.
5. **Geographical Scope:** Permission granted is non-exclusive, and is valid throughout the world in the English language and the languages specified in your original request.
6. Wolters Kluwer cannot supply the requestor with the original artwork, electronic files or a "clean copy."
7. Permission is valid if the borrowed material is original to a Wolters Kluwer imprint (Lippincott-Raven Publishers, Williams & Wilkins, Lea & Febiger, Harwal, Rapid Science, Little Brown & Company, Harper & Row Medical, American Journal of Nursing Co, and Urban & Schwarzenberg - English Language, Raven Press, Paul Hoeber, Springhouse, Ovid).
8. **Termination of contract:** If you opt not to use the material requested above please notify RightsLink or Wolters Kluwer within 90 days of the original invoice date.
9. This permission does not apply to images that are credited to publications other than Wolters Kluwer books/journals or its Societies. For images credited to non-Wolters Kluwer books or journals, you will need to obtain permission from the source referenced in the figure or table legend or credit line before making any use of the image(s) or table(s).
10. **Modifications:** With the exception of text size or color, no Wolters Kluwer material is permitted to be modified or adapted without publisher approval.
11. **Third party material:** Adaptations are protected by copyright, so if you would like to reuse material that we have adapted from another source, you will need not only our permission, but the permission of the rights holder of the original material. Similarly, if you want to reuse an adaptation of original LWW content that appears in another publishers work, you will need our permission and that of the next publisher. The adaptation should be credited as follows: Adapted with permission from Wolters Kluwer: Book author, title, year of publication or Journal name, article author, title, reference citation, year of publication. Modifications are permitted on an occasional basis only and permission must be sought by Wolters Kluwer.

12. **Duration of the license:** Permission is granted for a one-time use only within 12 months from the date of this invoice. Rights herein do not apply to future reproductions, editors, revisions, or other derivative works. Once the 12 - month term has expired, permission to renew must be submitted in writing.
  - i. For content reused in another journal or book, in print or electronic format, the license is one-time use and lasts for the 1st edition of a book or for the life of the edition in case of journals.
  - ii. If your Permission Request is for use on a website (which is not a journal or a book), internet, intranet, or any publicly accessible site, you agree to remove the material from such site after 12 months or else renew your permission request.
13. **Contingent on payment:** While you may exercise the rights licensed immediately upon issuance of the license at the end of the licensing process for the transaction, provided that you have disclosed complete and accurate details of your proposed use, no license is finally effective unless and until full payment is received from you (either by publisher or by CCC) as provided in CCC's Billing and Payment terms and conditions. If full payment is not received on a timely basis, then any license preliminarily granted shall be deemed automatically revoked and shall be void as if never granted. Further, in the event that you breach any of these terms and conditions or any of CCC's Billing and Payment terms and conditions, the license is automatically revoked and shall be void as if never granted. Use of materials as described in a revoked license, as well as any use of the materials beyond the scope of an unrevoked license, may constitute copyright infringement and publisher reserves the right to take any and all action to protect its copyright in the materials.
14. **Waived permission fee:** If the permission fee for the requested use of our material has been waived in this instance, please be advised that your future requests for Wolters Kluwer materials may incur a fee.
15. **Service Description for Content Services:** Subject to these terms of use, any terms set forth on the particular order, and payment of the applicable fee, you may make the following uses of the ordered materials:
  - i. **Content Rental:** You may access and view a single electronic copy of the materials ordered for the time period designated at the time the order is placed. Access to the materials will be provided through a dedicated content viewer or other portal, and access will be discontinued upon expiration of the designated time period. An order for Content Rental does not include any rights to print, download, save, create additional copies, to distribute or to reuse in any way the full text or parts of the materials.
  - ii. **Content Purchase:** You may access and download a single electronic copy of the materials ordered. Copies will be provided by email or by such other means as publisher may make available from time to time. An order for Content Purchase does not include any rights to create additional copies or to distribute copies of the materials.

### **For Journals Only:**

1. Please note that articles in the **ahead-of-print stage** of publication can be cited and the content may be re-used by including the date of access and the unique DOI number. Any final changes in manuscripts will be made at the time of print publication and will be reflected in the final electronic version of the issue. Disclaimer: Articles appearing in the Published Ahead-of-Print section have been peer-reviewed and accepted for publication in the relevant journal and posted online before print publication. Articles appearing as publish ahead-of-print may contain statements, opinions, and information that have errors in facts, figures, or interpretation. Accordingly, Wolters Kluwer, the editors and authors and their respective employees are not responsible or liable for the use of any such inaccurate or misleading data, opinion or information contained in the articles in this section.
2. Where a journal is being published by a learned society, the details of that society must be included in the credit line.
  - i. **For Open Access journals:** The following statement needs to be added when reprinting the material in Open Access journals only: "promotional and commercial use of the material in print, digital or mobile device format is prohibited without the permission from the publisher Wolters Kluwer. Please contact [healthpermissions@wolterskluwer.com](mailto:healthpermissions@wolterskluwer.com) for further information."

- ii. **Exceptions:** In case of reuse from **Diseases of the Colon & Rectum, Plastic Reconstructive Surgery, The Green Journal, Critical Care Medicine, Pediatric Critical Care Medicine, the American Heart Association Publications and the American Academy of Neurology** the following guideline applies: no drug/ trade name or logo can be included in the same page as the material re-used.
3. **Translations:** If granted permissions to republish a full text article in another language, Wolters Kluwer should be sent a copy of the translated PDF. Please include disclaimer below on all translated copies:
  - i. ***Wolters Kluwer and its Societies take no responsibility for the accuracy of the translation from the published English original and are not liable for any errors which may occur.***
4. **Full Text Articles:** Reuse of full text articles in English is prohibited.

### **STM Signatories Only:**

1. Any permission granted for a particular edition will apply also to subsequent editions and for editions in other languages, provided such editions are for the work as a whole in situ and does not involve the separate exploitation of the permitted illustrations or excerpts. Please click [here](#) to view the STM guidelines.

### **Other Terms and Conditions:**

v1.17

**Questions? [customercare@copyright.com](mailto:customercare@copyright.com) or +1-855-239-3415 (toll free in the US) or +1-978-646-2777.**

---

---



Figure 3

**WOLTERS KLUWER HEALTH, INC. LICENSE  
TERMS AND CONDITIONS**

Sep 01, 2017

This Agreement between University of Alabama at Birmingham -- Louis Dell'Italia ("You") and Wolters Kluwer Health, Inc. ("Wolters Kluwer Health, Inc.") consists of your license details and the terms and conditions provided by Wolters Kluwer Health, Inc. and Copyright Clearance Center.

|                                        |                                                                                                                                                                                                                                           |
|----------------------------------------|-------------------------------------------------------------------------------------------------------------------------------------------------------------------------------------------------------------------------------------------|
| License Number                         | 4180210579937                                                                                                                                                                                                                             |
| License date                           | Sep 01, 2017                                                                                                                                                                                                                              |
| Licensed Content Publisher             | Wolters Kluwer Health, Inc.                                                                                                                                                                                                               |
| Licensed Content Publication           | Circulation: Heart Failure                                                                                                                                                                                                                |
| Licensed Content Title                 | Increased Sarcolipin Expression and Adrenergic Drive in Humans With Preserved Left Ventricular Ejection Fraction and Chronic Isolated Mitral RegurgitationClinical Perspective                                                            |
| Licensed Content Author                | Junyong Zheng, Danielle M. Yancey, Mustafa I. Ahmed, Chih-Chang Wei, Pamela C. Powell, Mayilvahanan Shanmugam, Himanshu Gupta, Steven G. Lloyd, David C. McGiffin, Chun G. Schiros, Thomas S. Denney, Gopal J. Babu, Louis J. Dell'Italia |
| Licensed Content Date                  | Jan 1, 2014                                                                                                                                                                                                                               |
| Licensed Content Volume                | 7                                                                                                                                                                                                                                         |
| Licensed Content Issue                 | 1                                                                                                                                                                                                                                         |
| Type of Use                            | Journal/Magazine                                                                                                                                                                                                                          |
| Requestor type                         | Academic/Educational                                                                                                                                                                                                                      |
| Sponsorship                            | No Sponsorship                                                                                                                                                                                                                            |
| Format                                 | Print and electronic                                                                                                                                                                                                                      |
| Portion                                | Figures/table/illustration                                                                                                                                                                                                                |
| Number of figures/tables/illustrations | 1                                                                                                                                                                                                                                         |
| Figures/tables/illustrations used      | Figure 1                                                                                                                                                                                                                                  |
| Author of this Wolters Kluwer article  | Yes                                                                                                                                                                                                                                       |
| Will you be translating?               | No                                                                                                                                                                                                                                        |
| Title of the content                   | Multifunctional Role of Chymase in Acute and Chronic Tissue Injury and Remodeling                                                                                                                                                         |
| Publication the new content is in      | Circulation Research                                                                                                                                                                                                                      |
| Publisher of your content              | American Heart Association                                                                                                                                                                                                                |
| Author of the content                  | Dell'Italia                                                                                                                                                                                                                               |
| Expected publication date              | Jan 2018                                                                                                                                                                                                                                  |
| Estimated size of content (pages)      | 20                                                                                                                                                                                                                                        |
| Requestor Location                     | University of Alabama at Birmingham<br>901 19th Street South                                                                                                                                                                              |
| Publisher Tax ID                       | BIRMINGHAM, AL 35294<br>United States<br>Attn: University of Alabama at Birmingham<br>13-2932696                                                                                                                                          |

Billing Type Invoice  
University of Alabama at Birmingham  
901 19th Street South

Billing Address BIRMINGHAM, AL 35294  
United States  
Attn: University of Alabama at Birmingham

Total 0.00 USD

Terms and Conditions

### **Wolters Kluwer Terms and Conditions**

1. **Transfer of License:** Wolters Kluwer hereby grants you a non-exclusive license to reproduce this material for this purpose, and for no other use, subject to the conditions herein.
2. **Credit Line:** will be prominently placed and include: For books – the author(s), title of book, editor, copyright holder, year of publication; For journals – the author(s), title of article, title of journal, volume number, issue number, inclusive pages and website URL to the journal page.
3. **Warranties:** The requestor warrants that the material shall not be used in any manner which may be considered derogatory to the title, content, or authors of the material, or to Wolters Kluwer.
4. **Indemnity:** You hereby indemnify and hold harmless Wolters Kluwer and their respective officers, directors, employees and agents, from and against any and all claims, costs, proceeding or demands arising out of your unauthorized use of the Licensed Material.
5. **Geographical Scope:** Permission granted is non-exclusive, and is valid throughout the world in the English language and the languages specified in your original request.
6. Wolters Kluwer cannot supply the requestor with the original artwork, electronic files or a "clean copy."
7. Permission is valid if the borrowed material is original to a Wolters Kluwer imprint (Lippincott-Raven Publishers, Williams & Wilkins, Lea & Febiger, Harwal, Rapid Science, Little Brown & Company, Harper & Row Medical, American Journal of Nursing Co, and Urban & Schwarzenberg - English Language, Raven Press, Paul Hoeber, Springhouse, Ovid).
8. **Termination of contract:** If you opt not to use the material requested above please notify RightsLink or Wolters Kluwer within 90 days of the original invoice date.
9. This permission does not apply to images that are credited to publications other than Wolters Kluwer books/journals or its Societies. For images credited to non-Wolters Kluwer books or journals, you will need to obtain permission from the source referenced in the figure or table legend or credit line before making any use of the image(s) or table(s).
10. **Modifications:** With the exception of text size or color, no Wolters Kluwer material is permitted to be modified or adapted without publisher approval.
11. **Third party material:** Adaptations are protected by copyright, so if you would like to reuse material that we have adapted from another source, you will need not only our permission, but the permission of the rights holder of the original material. Similarly, if you want to reuse an adaptation of original LWW content that appears in another publishers work, you will need our permission and that of the next publisher. The adaptation should be credited as follows: Adapted with permission from Wolters Kluwer: Book author, title, year of publication or Journal name, article author, title, reference citation, year of publication. Modifications are permitted on an occasional basis only and permission must be sought by Wolters Kluwer.
12. **Duration of the license:** Permission is granted for a one-time use only within 12 months from the date of this invoice. Rights herein do not apply to future reproductions, editors, revisions, or other derivative works. Once the 12 - month term has expired, permission to renew must be submitted in writing.
  - i. For content reused in another journal or book, in print or electronic format, the license is one-time use and lasts for the 1st edition of a book or for the life of the edition in case of journals.
  - ii. If your Permission Request is for use on a website (which is not a journal or a book),

- internet, intranet, or any publicly accessible site, you agree to remove the material from such site after 12 months or else renew your permission request.
13. **Contingent on payment:** While you may exercise the rights licensed immediately upon issuance of the license at the end of the licensing process for the transaction, provided that you have disclosed complete and accurate details of your proposed use, no license is finally effective unless and until full payment is received from you (either by publisher or by CCC) as provided in CCC's Billing and Payment terms and conditions. If full payment is not received on a timely basis, then any license preliminarily granted shall be deemed automatically revoked and shall be void as if never granted. Further, in the event that you breach any of these terms and conditions or any of CCC's Billing and Payment terms and conditions, the license is automatically revoked and shall be void as if never granted. Use of materials as described in a revoked license, as well as any use of the materials beyond the scope of an unrevoked license, may constitute copyright infringement and publisher reserves the right to take any and all action to protect its copyright in the materials.
  14. **Waived permission fee:** If the permission fee for the requested use of our material has been waived in this instance, please be advised that your future requests for Wolters Kluwer materials may incur a fee.
  15. **Service Description for Content Services:** Subject to these terms of use, any terms set forth on the particular order, and payment of the applicable fee, you may make the following uses of the ordered materials:
    - i. **Content Rental:** You may access and view a single electronic copy of the materials ordered for the time period designated at the time the order is placed. Access to the materials will be provided through a dedicated content viewer or other portal, and access will be discontinued upon expiration of the designated time period. An order for Content Rental does not include any rights to print, download, save, create additional copies, to distribute or to reuse in any way the full text or parts of the materials.
    - ii. **Content Purchase:** You may access and download a single electronic copy of the materials ordered. Copies will be provided by email or by such other means as publisher may make available from time to time. An order for Content Purchase does not include any rights to create additional copies or to distribute copies of the materials.

### **For Journals Only:**

1. Please note that articles in the **ahead-of-print stage** of publication can be cited and the content may be re-used by including the date of access and the unique DOI number. Any final changes in manuscripts will be made at the time of print publication and will be reflected in the final electronic version of the issue. Disclaimer: Articles appearing in the Published Ahead-of-Print section have been peer-reviewed and accepted for publication in the relevant journal and posted online before print publication. Articles appearing as publish ahead-of-print may contain statements, opinions, and information that have errors in facts, figures, or interpretation. Accordingly, Wolters Kluwer, the editors and authors and their respective employees are not responsible or liable for the use of any such inaccurate or misleading data, opinion or information contained in the articles in this section.
2. Where a journal is being published by a learned society, the details of that society must be included in the credit line.
  - i. **For Open Access journals:** The following statement needs to be added when reprinting the material in Open Access journals only: "promotional and commercial use of the material in print, digital or mobile device format is prohibited without the permission from the publisher Wolters Kluwer. Please contact [healthpermissions@wolterskluwer.com](mailto:healthpermissions@wolterskluwer.com) for further information."
  - ii. **Exceptions:** In case of reuse from **Diseases of the Colon & Rectum, Plastic Reconstructive Surgery, The Green Journal, Critical Care Medicine, Pediatric Critical Care Medicine, the American Heart Association Publications and the American Academy of Neurology** the following guideline applies: no drug/ trade name or logo can be included in the same page as the material re-used.
3. **Translations:** If granted permissions to republish a full text article in another language, Wolters Kluwer should be sent a copy of the translated PDF. Please include disclaimer below on all translated copies:

- i. ***Wolters Kluwer and its Societies take no responsibility for the accuracy of the translation from the published English original and are not liable for any errors which may occur.***
4. **Full Text Articles:** Reuse of full text articles in English is prohibited.

**STM Signatories Only:**

1. Any permission granted for a particular edition will apply also to subsequent editions and for editions in other languages, provided such editions are for the work as a whole in situ and does not involve the separate exploitation of the permitted illustrations or excerpts. Please click [here](#) to view the STM guidelines.

**Other Terms and Conditions:**

v1.17

**Questions? [customercare@copyright.com](mailto:customercare@copyright.com) or +1-855-239-3415 (toll free in the US) or +1-978-646-2777.**

---

---

Figure 3

**WOLTERS KLUWER HEALTH, INC. LICENSE  
TERMS AND CONDITIONS**

Sep 01, 2017

This Agreement between University of Alabama at Birmingham -- Louis Dell'Italia ("You") and Wolters Kluwer Health, Inc. ("Wolters Kluwer Health, Inc.") consists of your license details and the terms and conditions provided by Wolters Kluwer Health, Inc. and Copyright Clearance Center.

|                                        |                                                                                    |
|----------------------------------------|------------------------------------------------------------------------------------|
| License Number                         | 4180211026668                                                                      |
| License date                           | Sep 01, 2017                                                                       |
| Licensed Content Publisher             | Wolters Kluwer Health, Inc.                                                        |
| Licensed Content Publication           | Circulation Research                                                               |
| Licensed Content Title                 | Mechanisms of Plaque Formation and Rupture                                         |
| Licensed Content Author                | Jacob Fog Bentzon, Fumiyuki Otsuka, Renu Virmani, Erling Falk                      |
| Licensed Content Date                  | Jun 6, 2014                                                                        |
| Licensed Content Volume                | 114                                                                                |
| Licensed Content Issue                 | 12                                                                                 |
| Type of Use                            | Journal/Magazine                                                                   |
| Requestor type                         | Academic/Educational                                                               |
| Sponsorship                            | No Sponsorship                                                                     |
| Format                                 | Print and electronic                                                               |
| Portion                                | Figures/table/illustration                                                         |
| Number of figures/tables/illustrations | 1                                                                                  |
| Figures/tables/illustrations used      | Figure 3                                                                           |
| Author of this Wolters Kluwer article  | Yes                                                                                |
| Will you be translating?               | No                                                                                 |
| Title of the content                   | Multifunctional Role of Chymase in Acute and Chronic Tissue Injury and Remodeling  |
| Publication the new content is in      | Circulation Research                                                               |
| Publisher of your content              | American Heart Association                                                         |
| Author of the content                  | Dell'Italia                                                                        |
| Expected publication date              | Jan 2018                                                                           |
| Estimated size of content (pages)      | 20                                                                                 |
| Requestor Location                     | University of Alabama at Birmingham<br>901 19th Street South                       |
|                                        | BIRMINGHAM, AL 35294<br>United States<br>Attn: University of Alabama at Birmingham |
| Publisher Tax ID                       | 13-2932696                                                                         |
| Billing Type                           | Invoice                                                                            |
| Billing Address                        | University of Alabama at Birmingham<br>901 19th Street South                       |
|                                        | BIRMINGHAM, AL 35294<br>United States<br>Attn: University of Alabama at Birmingham |

Total 0.00 USD  
Terms and Conditions

### **Wolters Kluwer Terms and Conditions**

1. **Transfer of License:** Wolters Kluwer hereby grants you a non-exclusive license to reproduce this material for this purpose, and for no other use, subject to the conditions herein.
2. **Credit Line:** will be prominently placed and include: For books – the author(s), title of book, editor, copyright holder, year of publication; For journals – the author(s), title of article, title of journal, volume number, issue number, inclusive pages and website URL to the journal page.
3. **Warranties:** The requestor warrants that the material shall not be used in any manner which may be considered derogatory to the title, content, or authors of the material, or to Wolters Kluwer.
4. **Indemnity:** You hereby indemnify and hold harmless Wolters Kluwer and their respective officers, directors, employees and agents, from and against any and all claims, costs, proceeding or demands arising out of your unauthorized use of the Licensed Material.
5. **Geographical Scope:** Permission granted is non-exclusive, and is valid throughout the world in the English language and the languages specified in your original request.
6. Wolters Kluwer cannot supply the requestor with the original artwork, electronic files or a "clean copy."
7. Permission is valid if the borrowed material is original to a Wolters Kluwer imprint (Lippincott-Raven Publishers, Williams & Wilkins, Lea & Febiger, Harwal, Rapid Science, Little Brown & Company, Harper & Row Medical, American Journal of Nursing Co, and Urban & Schwarzenberg - English Language, Raven Press, Paul Hoeber, Springhouse, Ovid).
8. **Termination of contract:** If you opt not to use the material requested above please notify RightsLink or Wolters Kluwer within 90 days of the original invoice date.
9. This permission does not apply to images that are credited to publications other than Wolters Kluwer books/journals or its Societies. For images credited to non-Wolters Kluwer books or journals, you will need to obtain permission from the source referenced in the figure or table legend or credit line before making any use of the image(s) or table(s).
10. **Modifications:** With the exception of text size or color, no Wolters Kluwer material is permitted to be modified or adapted without publisher approval.
11. **Third party material:** Adaptations are protected by copyright, so if you would like to reuse material that we have adapted from another source, you will need not only our permission, but the permission of the rights holder of the original material. Similarly, if you want to reuse an adaptation of original LWW content that appears in another publishers work, you will need our permission and that of the next publisher. The adaptation should be credited as follows: Adapted with permission from Wolters Kluwer: Book author, title, year of publication or Journal name, article author, title, reference citation, year of publication. Modifications are permitted on an occasional basis only and permission must be sought by Wolters Kluwer.
12. **Duration of the license:** Permission is granted for a one-time use only within 12 months from the date of this invoice. Rights herein do not apply to future reproductions, editors, revisions, or other derivative works. Once the 12 - month term has expired, permission to renew must be submitted in writing.
  - i. For content reused in another journal or book, in print or electronic format, the license is one-time use and lasts for the 1st edition of a book or for the life of the edition in case of journals.
  - ii. If your Permission Request is for use on a website (which is not a journal or a book), internet, intranet, or any publicly accessible site, you agree to remove the material from such site after 12 months or else renew your permission request.
13. **Contingent on payment:** While you may exercise the rights licensed immediately upon issuance of the license at the end of the licensing process for the transaction, provided that you have disclosed complete and accurate details of your proposed use, no license is finally effective unless and until full payment is received from you (either by publisher or by CCC) as provided in CCC's Billing and Payment terms and conditions. If full payment is not received on a timely basis, then any license preliminarily granted shall be deemed automatically revoked and shall be void as if never granted. Further, in the event that you

- breach any of these terms and conditions or any of CCC's Billing and Payment terms and conditions, the license is automatically revoked and shall be void as if never granted. Use of materials as described in a revoked license, as well as any use of the materials beyond the scope of an unrevoked license, may constitute copyright infringement and publisher reserves the right to take any and all action to protect its copyright in the materials.
14. **Waived permission fee:** If the permission fee for the requested use of our material has been waived in this instance, please be advised that your future requests for Wolters Kluwer materials may incur a fee.
  15. **Service Description for Content Services:** Subject to these terms of use, any terms set forth on the particular order, and payment of the applicable fee, you may make the following uses of the ordered materials:
    - i. **Content Rental:** You may access and view a single electronic copy of the materials ordered for the time period designated at the time the order is placed. Access to the materials will be provided through a dedicated content viewer or other portal, and access will be discontinued upon expiration of the designated time period. An order for Content Rental does not include any rights to print, download, save, create additional copies, to distribute or to reuse in any way the full text or parts of the materials.
    - ii. **Content Purchase:** You may access and download a single electronic copy of the materials ordered. Copies will be provided by email or by such other means as publisher may make available from time to time. An order for Content Purchase does not include any rights to create additional copies or to distribute copies of the materials.

### For Journals Only:

1. Please note that articles in the **ahead-of-print stage** of publication can be cited and the content may be re-used by including the date of access and the unique DOI number. Any final changes in manuscripts will be made at the time of print publication and will be reflected in the final electronic version of the issue. Disclaimer: Articles appearing in the Published Ahead-of-Print section have been peer-reviewed and accepted for publication in the relevant journal and posted online before print publication. Articles appearing as publish ahead-of-print may contain statements, opinions, and information that have errors in facts, figures, or interpretation. Accordingly, Wolters Kluwer, the editors and authors and their respective employees are not responsible or liable for the use of any such inaccurate or misleading data, opinion or information contained in the articles in this section.
2. Where a journal is being published by a learned society, the details of that society must be included in the credit line.
  - i. **For Open Access journals:** The following statement needs to be added when reprinting the material in Open Access journals only: "promotional and commercial use of the material in print, digital or mobile device format is prohibited without the permission from the publisher Wolters Kluwer. Please contact [healthpermissions@wolterskluwer.com](mailto:healthpermissions@wolterskluwer.com) for further information."
  - ii. **Exceptions:** In case of reuse from **Diseases of the Colon & Rectum, Plastic Reconstructive Surgery, The Green Journal, Critical Care Medicine, Pediatric Critical Care Medicine, The American Heart Association Publications and the American Academy of Neurology** the following guideline applies: no drug/ trade name or logo can be included in the same page as the material re-used.
3. **Translations:** If granted permissions to republish a full text article in another language, Wolters Kluwer should be sent a copy of the translated PDF. Please include disclaimer below on all translated copies:
  - i. **Wolters Kluwer and its Societies take no responsibility for the accuracy of the translation from the published English original and are not liable for any errors which may occur.**
4. **Full Text Articles:** Reuse of full text articles in English is prohibited.

### STM Signatories Only:

1. Any permission granted for a particular edition will apply also to subsequent editions and for editions in other languages, provided such editions are for the work as a whole in situ and does not involve the separate exploitation of the permitted illustrations or excerpts. Please click [here](#) to view the STM guidelines.

**Other Terms and Conditions:**

v1.17

**Questions? [customercare@copyright.com](mailto:customercare@copyright.com) or +1-855-239-3415 (toll free in the US) or +1-978-646-2777.**

---

---



Fig 3

**ELSEVIER LICENSE  
TERMS AND CONDITIONS**

Oct 09, 2017

This Agreement between University of Alabama at Birmingham -- Louis Dell'Italia ("You") and Elsevier ("Elsevier") consists of your license details and the terms and conditions provided by Elsevier and Copyright Clearance Center.

|                                                 |                                                                                                                                                                                        |
|-------------------------------------------------|----------------------------------------------------------------------------------------------------------------------------------------------------------------------------------------|
| License Number                                  | 4180220620232                                                                                                                                                                          |
| License date                                    | Sep 01, 2017                                                                                                                                                                           |
| Licensed Content Publisher                      | Elsevier                                                                                                                                                                               |
| Licensed Content Publication                    | American Heart Journal                                                                                                                                                                 |
| Licensed Content Title                          | Changes in left ventricular mass and volumes in patients receiving angiotensin-converting enzyme inhibitor therapy for left ventricular dysfunction after Q-wave myocardial infarction |
| Licensed Content Author                         | Robert E. Foster, David B. Johnson, Francesco Barilla, Gerald G. Blackwell, Roger Orr, Maryann Roney, Alfred W.H. Stanley, Gerald M. Pohost, Louis J. Dell'Italia                      |
| Licensed Content Date                           | Aug 1, 1998                                                                                                                                                                            |
| Licensed Content Volume                         | 136                                                                                                                                                                                    |
| Licensed Content Issue                          | 2                                                                                                                                                                                      |
| Licensed Content Pages                          | 7                                                                                                                                                                                      |
| Start Page                                      | 269                                                                                                                                                                                    |
| End Page                                        | 275                                                                                                                                                                                    |
| Type of Use                                     | reuse in a journal/magazine                                                                                                                                                            |
| Requestor type                                  | non-commercial company (non-profit)                                                                                                                                                    |
| Portion                                         | figures/tables/illustrations                                                                                                                                                           |
| Number of figures/tables/illustrations          | 1                                                                                                                                                                                      |
| Format                                          | both print and electronic                                                                                                                                                              |
| Are you the author of this Elsevier article?    | Yes                                                                                                                                                                                    |
| Will you be translating?                        | No                                                                                                                                                                                     |
| Original figure numbers                         | Figure 1                                                                                                                                                                               |
| Title of the article                            | Multifunctional Role of Chymase in Acute and Chronic Tissue Injury and Remodeling                                                                                                      |
| Publication new article is in                   | Circulation Research                                                                                                                                                                   |
| Publisher of the new article                    | American Heart Association                                                                                                                                                             |
| Author of new article                           | Dell'Italia                                                                                                                                                                            |
| Expected publication date                       | Jan 2018                                                                                                                                                                               |
| Estimated size of new article (number of pages) | 20                                                                                                                                                                                     |

Requestor Location            University of Alabama at Birmingham  
                                         901 19th Street South  
  
                                         BIRMINGHAM, AL 35294  
                                         United States  
                                         Attn: University of Alabama at Birmingham

Publisher Tax ID            98-0397604

Total                            0.00 USD

Terms and Conditions

### INTRODUCTION

1. The publisher for this copyrighted material is Elsevier. By clicking "accept" in connection with completing this licensing transaction, you agree that the following terms and conditions apply to this transaction (along with the Billing and Payment terms and conditions established by Copyright Clearance Center, Inc. ("CCC"), at the time that you opened your Rightslink account and that are available at any time at <http://myaccount.copyright.com>).

### GENERAL TERMS

2. Elsevier hereby grants you permission to reproduce the aforementioned material subject to the terms and conditions indicated.
3. Acknowledgement: If any part of the material to be used (for example, figures) has appeared in our publication with credit or acknowledgement to another source, permission must also be sought from that source. If such permission is not obtained then that material may not be included in your publication/copies. Suitable acknowledgement to the source must be made, either as a footnote or in a reference list at the end of your publication, as follows:  
"Reprinted from Publication title, Vol /edition number, Author(s), Title of article / title of chapter, Pages No., Copyright (Year), with permission from Elsevier [OR APPLICABLE SOCIETY COPYRIGHT OWNER]." Also Lancet special credit - "Reprinted from The Lancet, Vol. number, Author(s), Title of article, Pages No., Copyright (Year), with permission from Elsevier."
4. Reproduction of this material is confined to the purpose and/or media for which permission is hereby given.
5. Altering/Modifying Material: Not Permitted. However figures and illustrations may be altered/adapted minimally to serve your work. Any other abbreviations, additions, deletions and/or any other alterations shall be made only with prior written authorization of Elsevier Ltd. (Please contact Elsevier at [permissions@elsevier.com](mailto:permissions@elsevier.com)). No modifications can be made to any Lancet figures/tables and they must be reproduced in full.
6. If the permission fee for the requested use of our material is waived in this instance, please be advised that your future requests for Elsevier materials may attract a fee.
7. Reservation of Rights: Publisher reserves all rights not specifically granted in the combination of (i) the license details provided by you and accepted in the course of this licensing transaction, (ii) these terms and conditions and (iii) CCC's Billing and Payment terms and conditions.
8. License Contingent Upon Payment: While you may exercise the rights licensed immediately upon issuance of the license at the end of the licensing process for the transaction, provided that you have disclosed complete and accurate details of your proposed use, no license is finally effective unless and until full payment is received from you (either by publisher or by CCC) as provided in CCC's Billing and Payment terms and conditions. If

full payment is not received on a timely basis, then any license preliminarily granted shall be deemed automatically revoked and shall be void as if never granted. Further, in the event that you breach any of these terms and conditions or any of CCC's Billing and Payment terms and conditions, the license is automatically revoked and shall be void as if never granted. Use of materials as described in a revoked license, as well as any use of the materials beyond the scope of an unrevoked license, may constitute copyright infringement and publisher reserves the right to take any and all action to protect its copyright in the materials.

9. Warranties: Publisher makes no representations or warranties with respect to the licensed material.

10. Indemnity: You hereby indemnify and agree to hold harmless publisher and CCC, and their respective officers, directors, employees and agents, from and against any and all claims arising out of your use of the licensed material other than as specifically authorized pursuant to this license.

11. No Transfer of License: This license is personal to you and may not be sublicensed, assigned, or transferred by you to any other person without publisher's written permission.

12. No Amendment Except in Writing: This license may not be amended except in a writing signed by both parties (or, in the case of publisher, by CCC on publisher's behalf).

13. Objection to Contrary Terms: Publisher hereby objects to any terms contained in any purchase order, acknowledgment, check endorsement or other writing prepared by you, which terms are inconsistent with these terms and conditions or CCC's Billing and Payment terms and conditions. These terms and conditions, together with CCC's Billing and Payment terms and conditions (which are incorporated herein), comprise the entire agreement between you and publisher (and CCC) concerning this licensing transaction. In the event of any conflict between your obligations established by these terms and conditions and those established by CCC's Billing and Payment terms and conditions, these terms and conditions shall control.

14. Revocation: Elsevier or Copyright Clearance Center may deny the permissions described in this License at their sole discretion, for any reason or no reason, with a full refund payable to you. Notice of such denial will be made using the contact information provided by you. Failure to receive such notice will not alter or invalidate the denial. In no event will Elsevier or Copyright Clearance Center be responsible or liable for any costs, expenses or damage incurred by you as a result of a denial of your permission request, other than a refund of the amount(s) paid by you to Elsevier and/or Copyright Clearance Center for denied permissions.

#### LIMITED LICENSE

The following terms and conditions apply only to specific license types:

15. **Translation:** This permission is granted for non-exclusive world **English** rights only unless your license was granted for translation rights. If you licensed translation rights you may only translate this content into the languages you requested. A professional translator must perform all translations and reproduce the content word for word preserving the integrity of the article.

16. **Posting licensed content on any Website:** The following terms and conditions apply as follows: Licensing material from an Elsevier journal: All content posted to the web site must maintain the copyright information line on the bottom of each image; A hyper-text must be included to the Homepage of the journal from which you are licensing at <http://www.sciencedirect.com/science/journal/xxxxx> or the Elsevier homepage for books at <http://www.elsevier.com>; Central Storage: This license does not include permission for a

scanned version of the material to be stored in a central repository such as that provided by Heron/XanEdu.

Licensing material from an Elsevier book: A hyper-text link must be included to the Elsevier homepage at <http://www.elsevier.com> . All content posted to the web site must maintain the copyright information line on the bottom of each image.

**Posting licensed content on Electronic reserve:** In addition to the above the following clauses are applicable: The web site must be password-protected and made available only to bona fide students registered on a relevant course. This permission is granted for 1 year only. You may obtain a new license for future website posting.

**17. For journal authors:** the following clauses are applicable in addition to the above:

**Preprints:**

A preprint is an author's own write-up of research results and analysis, it has not been peer-reviewed, nor has it had any other value added to it by a publisher (such as formatting, copyright, technical enhancement etc.).

Authors can share their preprints anywhere at any time. Preprints should not be added to or enhanced in any way in order to appear more like, or to substitute for, the final versions of articles however authors can update their preprints on arXiv or RePEc with their Accepted Author Manuscript (see below).

If accepted for publication, we encourage authors to link from the preprint to their formal publication via its DOI. Millions of researchers have access to the formal publications on ScienceDirect, and so links will help users to find, access, cite and use the best available version. Please note that Cell Press, The Lancet and some society-owned have different preprint policies. Information on these policies is available on the journal homepage.

**Accepted Author Manuscripts:** An accepted author manuscript is the manuscript of an article that has been accepted for publication and which typically includes author-incorporated changes suggested during submission, peer review and editor-author communications.

Authors can share their accepted author manuscript:

- immediately
  - via their non-commercial person homepage or blog
  - by updating a preprint in arXiv or RePEc with the accepted manuscript
  - via their research institute or institutional repository for internal institutional uses or as part of an invitation-only research collaboration work-group
  - directly by providing copies to their students or to research collaborators for their personal use
  - for private scholarly sharing as part of an invitation-only work group on commercial sites with which Elsevier has an agreement
- After the embargo period
  - via non-commercial hosting platforms such as their institutional repository
  - via commercial sites with which Elsevier has an agreement

In all cases accepted manuscripts should:

- link to the formal publication via its DOI
- bear a CC-BY-NC-ND license - this is easy to do

- if aggregated with other manuscripts, for example in a repository or other site, be shared in alignment with our hosting policy not be added to or enhanced in any way to appear more like, or to substitute for, the published journal article.

**Published journal article (JPA):** A published journal article (PJA) is the definitive final record of published research that appears or will appear in the journal and embodies all value-adding publishing activities including peer review co-ordination, copy-editing, formatting, (if relevant) pagination and online enrichment.

Policies for sharing publishing journal articles differ for subscription and gold open access articles:

**Subscription Articles:** If you are an author, please share a link to your article rather than the full-text. Millions of researchers have access to the formal publications on ScienceDirect, and so links will help your users to find, access, cite, and use the best available version. Theses and dissertations which contain embedded PJAs as part of the formal submission can be posted publicly by the awarding institution with DOI links back to the formal publications on ScienceDirect.

If you are affiliated with a library that subscribes to ScienceDirect you have additional private sharing rights for others' research accessed under that agreement. This includes use for classroom teaching and internal training at the institution (including use in course packs and courseware programs), and inclusion of the article for grant funding purposes.

**Gold Open Access Articles:** May be shared according to the author-selected end-user license and should contain a [CrossMark logo](#), the end user license, and a DOI link to the formal publication on ScienceDirect.

Please refer to Elsevier's [posting policy](#) for further information.

18. **For book authors** the following clauses are applicable in addition to the above:

Authors are permitted to place a brief summary of their work online only. You are not allowed to download and post the published electronic version of your chapter, nor may you scan the printed edition to create an electronic version. **Posting to a repository:** Authors are permitted to post a summary of their chapter only in their institution's repository.

19. **Thesis/Dissertation:** If your license is for use in a thesis/dissertation your thesis may be submitted to your institution in either print or electronic form. Should your thesis be published commercially, please reapply for permission. These requirements include permission for the Library and Archives of Canada to supply single copies, on demand, of the complete thesis and include permission for Proquest/UMI to supply single copies, on demand, of the complete thesis. Should your thesis be published commercially, please reapply for permission. Theses and dissertations which contain embedded PJAs as part of the formal submission can be posted publicly by the awarding institution with DOI links back to the formal publications on ScienceDirect.

### **Elsevier Open Access Terms and Conditions**

You can publish open access with Elsevier in hundreds of open access journals or in nearly 2000 established subscription journals that support open access publishing. Permitted third party re-use of these open access articles is defined by the author's choice of Creative Commons user license. See our [open access license policy](#) for more information.

#### **Terms & Conditions applicable to all Open Access articles published with Elsevier:**

Any reuse of the article must not represent the author as endorsing the adaptation of the article nor should the article be modified in such a way as to damage the author's honour or reputation. If any changes have been made, such changes must be clearly indicated.

The author(s) must be appropriately credited and we ask that you include the end user license and a DOI link to the formal publication on ScienceDirect.

If any part of the material to be used (for example, figures) has appeared in our publication with credit or acknowledgement to another source it is the responsibility of the user to ensure their reuse complies with the terms and conditions determined by the rights holder.

**Additional Terms & Conditions applicable to each Creative Commons user license:**

**CC BY:** The CC-BY license allows users to copy, to create extracts, abstracts and new works from the Article, to alter and revise the Article and to make commercial use of the Article (including reuse and/or resale of the Article by commercial entities), provided the user gives appropriate credit (with a link to the formal publication through the relevant DOI), provides a link to the license, indicates if changes were made and the licensor is not represented as endorsing the use made of the work. The full details of the license are available at <http://creativecommons.org/licenses/by/4.0>.

**CC BY NC SA:** The CC BY-NC-SA license allows users to copy, to create extracts, abstracts and new works from the Article, to alter and revise the Article, provided this is not done for commercial purposes, and that the user gives appropriate credit (with a link to the formal publication through the relevant DOI), provides a link to the license, indicates if changes were made and the licensor is not represented as endorsing the use made of the work. Further, any new works must be made available on the same conditions. The full details of the license are available at <http://creativecommons.org/licenses/by-nc-sa/4.0>.

**CC BY NC ND:** The CC BY-NC-ND license allows users to copy and distribute the Article, provided this is not done for commercial purposes and further does not permit distribution of the Article if it is changed or edited in any way, and provided the user gives appropriate credit (with a link to the formal publication through the relevant DOI), provides a link to the license, and that the licensor is not represented as endorsing the use made of the work. The full details of the license are available at <http://creativecommons.org/licenses/by-nc-nd/4.0>. Any commercial reuse of Open Access articles published with a CC BY NC SA or CC BY NC ND license requires permission from Elsevier and will be subject to a fee.

Commercial reuse includes:

- Associating advertising with the full text of the Article
- Charging fees for document delivery or access
- Article aggregation
- Systematic distribution via e-mail lists or share buttons

Posting or linking by commercial companies for use by customers of those companies.

**20. Other Conditions:**

v1.9

**Questions? [customercare@copyright.com](mailto:customercare@copyright.com) or +1-855-239-3415 (toll free in the US) or +1-978-646-2777.**

Figure 4

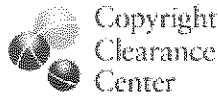

**Note:** Copyright.com supplies permissions but not the copyrighted content itself.

1  
PAYMENT

2  
REVIEW

3  
CONFIRMATION

**Step 3: Order Confirmation**

**Thank you for your order!** A confirmation for your order will be sent to your account email address. If you have questions about your order, you can call us 24 hrs/day, M-F at +1.855.239.3415 Toll Free, or write to us at info@copyright.com. This is not an invoice.

**Confirmation Number: 11674757**  
**Order Date: 10/09/2017**

If you paid by credit card, your order will be finalized and your card will be charged within 24 hours. If you choose to be invoiced, you can change or cancel your order until the invoice is generated.

**Payment Information**

Louis Dell'italia  
University of Alabama at Birmingham  
ldellitalia@uabmc.edu  
+1 (205) 934-0850  
Payment Method: CC ending in 4208

**Order Details**

**JOURNAL OF CLINICAL INVESTIGATION. ONLINE**

|                                                               |                                                                                                                                                                   |
|---------------------------------------------------------------|-------------------------------------------------------------------------------------------------------------------------------------------------------------------|
| <b>Order detail ID:</b> 70738313                              | <b>Permission Status:</b> <input checked="" type="radio"/> <b>Granted</b>                                                                                         |
| <b>Order License Id:</b> 4204850764650                        | <b>Permission type:</b> Republish or display content                                                                                                              |
| <b>ISSN:</b> 1558-8238                                        | <b>Type of use:</b> Republish in a journal/magazine                                                                                                               |
| <b>Publication Type:</b> e-Journal                            | <b>Requestor type:</b> Not-for-profit entity                                                                                                                      |
| <b>Volume:</b>                                                | <b>Format:</b> Print, Electronic                                                                                                                                  |
| <b>Issue:</b>                                                 | <b>Portion:</b> chart/graph/table/figure                                                                                                                          |
| <b>Start page:</b>                                            | <b>Number of charts/graphs/tables/figures:</b> 1                                                                                                                  |
| <b>Publisher:</b> AMERICAN SOCIETY FOR CLINICAL INVESTIGATION | <b>The requesting person/organization:</b> Louis J Dell'Italia, MD                                                                                                |
|                                                               | <b>Title or numeric reference of the portion (s):</b> Figure 7                                                                                                    |
|                                                               | <b>Title of the article or chapter the portion is from:</b> Mast cell chymase limits the cardiac efficacy of Ang I-converting enzyme inhibitor therapy in rodents |

|                                                        |                                                                                   |
|--------------------------------------------------------|-----------------------------------------------------------------------------------|
| <b>Editor of portion(s)</b>                            | N/A                                                                               |
| <b>Author of portion(s)</b>                            | dell'Italia                                                                       |
| <b>Volume of serial or monograph</b>                   | 120                                                                               |
| <b>Issue, if republishing an article from a serial</b> | 4                                                                                 |
| <b>Page range of portion</b>                           | 1234                                                                              |
| <b>Publication date of portion</b>                     | 2010                                                                              |
| <b>Rights for</b>                                      | Main product                                                                      |
| <b>Duration of use</b>                                 | Life of current edition                                                           |
| <b>Creation of copies for the disabled</b>             | yes                                                                               |
| <b>With minor editing privileges</b>                   | no                                                                                |
| <b>For distribution to</b>                             | Worldwide                                                                         |
| <b>In the following language(s)</b>                    | Original language of publication                                                  |
| <b>With incidental promotional use</b>                 | no                                                                                |
| <b>Lifetime unit quantity of new product</b>           | Up to 499                                                                         |
| <b>Order reference number</b>                          |                                                                                   |
| <b>Title</b>                                           | Multifunctional Role of Chymase in Acute and Chronic Tissue Injury and Remodeling |
| <b>Author</b>                                          | Dell'Italia                                                                       |
| <b>Publication</b>                                     | Circulation Research                                                              |
| <b>Publisher</b>                                       | American Heart Association                                                        |
| <b>Expected publication date</b>                       | Jan 2018                                                                          |
| <b>Expected size</b>                                   | 20                                                                                |



**Available markets**

**Proposed price**

**Standard identifier**

**Note:** This item will be invoiced or charged separately through CCC's **RightsLink** service. More info

**\$ 41.00**

|                             |                                |                               |
|-----------------------------|--------------------------------|-------------------------------|
| <b>Total order items: 1</b> | <b>This is not an invoice.</b> | <b>Order Total: 41.00 USD</b> |
|-----------------------------|--------------------------------|-------------------------------|

**Confirmation Number: 11674757**

**Special Rightsholder Terms & Conditions**

The following terms & conditions apply to the specific publication under which they are listed

**JOURNAL OF CLINICAL INVESTIGATION. ONLINE**

**Permission type:** Republish or display content

**Type of use:** Republish in a journal/magazine

**TERMS AND CONDITIONS**

**The following terms are individual to this publisher:**

None

**Other Terms and Conditions:**

**STANDARD TERMS AND CONDITIONS**

1. Description of Service; Defined Terms. This Republication License enables the User to obtain licenses for republication of one or more copyrighted works as described in detail on the relevant Order Confirmation (the "Work(s)"). Copyright Clearance Center, Inc. ("CCC") grants licenses through the Service on behalf of the rightsholder identified on the Order Confirmation (the "Rightsholder"). "Republication", as used herein, generally means the inclusion of a Work, in whole or in part, in a new work or works, also as described on the Order Confirmation. "User", as used herein, means the person or entity making such republication.

2. The terms set forth in the relevant Order Confirmation, and any terms set by the Rightsholder with respect to a particular Work, govern the terms of use of Works in connection with the Service. By using the Service, the person transacting for a republication license on behalf of the User represents and warrants that he/she/it (a) has been duly authorized by the User to accept, and hereby does accept, all such terms and conditions on behalf of User, and (b) shall inform User of all such terms and conditions. In the event such person is a "freelancer" or other third party independent of User and CCC, such party shall be deemed jointly a "User" for purposes of these terms and conditions. In any event, User shall be deemed to have accepted and agreed to all such terms and conditions if User republishes the Work in any fashion.

**3. Scope of License; Limitations and Obligations.**

3.1 All Works and all rights therein, including copyright rights, remain the sole and exclusive property of the Rightsholder. The license created by the exchange of an Order Confirmation (and/or any invoice) and payment by User of the full amount set forth on that document includes only those rights expressly set forth in the Order Confirmation and in these terms and conditions, and conveys no other rights in the Work(s) to User. All rights not expressly granted are hereby reserved.

3.2 General Payment Terms: You may pay by credit card or through an account with us payable at the end of the month. If you and we agree that you may establish a standing account with CCC, then the following terms apply: Remit Payment to: Copyright Clearance Center, 29118 Network Place, Chicago, IL 60673-1291. Payments Due: Invoices are payable upon their delivery to you (or upon our notice to you that they are available to you for downloading). After 30 days, outstanding amounts will be subject to a service charge of 1-1/2% per month or, if less, the maximum rate allowed by applicable law. Unless otherwise specifically set forth in the Order Confirmation or in a separate written agreement signed by CCC, invoices are due and payable on "net 30" terms. While User may exercise the rights licensed immediately upon issuance of the Order Confirmation, the license is automatically revoked and is null and void, as if it had never been issued, if complete payment for the license is not received on a timely basis either from User directly or through a payment agent, such as a credit card company.

3.3 Unless otherwise provided in the Order Confirmation, any grant of rights to User (i) is "one-time" (including the editions and product family specified in the license), (ii) is non-exclusive and non-transferable and (iii) is subject to any and all limitations and restrictions (such as, but not limited to, limitations on duration of use or circulation) included in the Order Confirmation or invoice and/or in these terms and conditions. Upon completion of the licensed use, User shall either secure a new permission for further use of the Work(s) or immediately cease any new use of the Work(s) and shall render inaccessible (such as by deleting or by removing or severing links or other locators) any further copies of the Work (except for copies printed on paper in accordance with this license and still in User's stock at the end of such period).

3.4 In the event that the material for which a republication license is sought includes third party materials (such as photographs, illustrations, graphs, inserts and similar materials) which are identified in such material as having been used by permission, User is responsible for identifying, and seeking separate licenses (under this Service or otherwise) for, any of such third party materials; without a separate license, such third party materials may not be used.

3.5 Use of proper copyright notice for a Work is required as a condition of any license granted under the Service. Unless otherwise provided in the Order Confirmation, a proper copyright notice will read substantially as follows: "Republished with permission of [Rightsholder's name], from [Work's title, author, volume, edition number and year of copyright]; permission conveyed through Copyright Clearance Center, Inc." Such notice must be provided in a reasonably legible font size and must be placed either immediately adjacent to the Work as used (for example, as part of a by-line or footnote but not as a separate electronic link) or in the place where substantially all other credits or notices for the new work

containing the republished Work are located. Failure to include the required notice results in loss to the Rightsholder and CCC, and the User shall be liable to pay liquidated damages for each such failure equal to twice the use fee specified in the Order Confirmation, in addition to the use fee itself and any other fees and charges specified.

3.6 User may only make alterations to the Work if and as expressly set forth in the Order Confirmation. No Work may be used in any way that is defamatory, violates the rights of third parties (including such third parties' rights of copyright, privacy, publicity, or other tangible or intangible property), or is otherwise illegal, sexually explicit or obscene. In addition, User may not conjoin a Work with any other material that may result in damage to the reputation of the Rightsholder. User agrees to inform CCC if it becomes aware of any infringement of any rights in a Work and to cooperate with any reasonable request of CCC or the Rightsholder in connection therewith.

4. Indemnity. User hereby indemnifies and agrees to defend the Rightsholder and CCC, and their respective employees and directors, against all claims, liability, damages, costs and expenses, including legal fees and expenses, arising out of any use of a Work beyond the scope of the rights granted herein, or any use of a Work which has been altered in any unauthorized way by User, including claims of defamation or infringement of rights of copyright, publicity, privacy or other tangible or intangible property.

5. Limitation of Liability. UNDER NO CIRCUMSTANCES WILL CCC OR THE RIGHTSHOLDER BE LIABLE FOR ANY DIRECT, INDIRECT, CONSEQUENTIAL OR INCIDENTAL DAMAGES (INCLUDING WITHOUT LIMITATION DAMAGES FOR LOSS OF BUSINESS PROFITS OR INFORMATION, OR FOR BUSINESS INTERRUPTION) ARISING OUT OF THE USE OR INABILITY TO USE A WORK, EVEN IF ONE OF THEM HAS BEEN ADVISED OF THE POSSIBILITY OF SUCH DAMAGES. In any event, the total liability of the Rightsholder and CCC (including their respective employees and directors) shall not exceed the total amount actually paid by User for this license. User assumes full liability for the actions and omissions of its principals, employees, agents, affiliates, successors and assigns.

6. Limited Warranties. THE WORK(S) AND RIGHT(S) ARE PROVIDED "AS IS". CCC HAS THE RIGHT TO GRANT TO USER THE RIGHTS GRANTED IN THE ORDER CONFIRMATION DOCUMENT. CCC AND THE RIGHTSHOLDER DISCLAIM ALL OTHER WARRANTIES RELATING TO THE WORK(S) AND RIGHT(S), EITHER EXPRESS OR IMPLIED, INCLUDING WITHOUT LIMITATION IMPLIED WARRANTIES OF MERCHANTABILITY OR FITNESS FOR A PARTICULAR PURPOSE. ADDITIONAL RIGHTS MAY BE REQUIRED TO USE ILLUSTRATIONS, GRAPHS, PHOTOGRAPHS, ABSTRACTS, INSERTS OR OTHER PORTIONS OF THE WORK (AS OPPOSED TO THE ENTIRE WORK) IN A MANNER CONTEMPLATED BY USER; USER UNDERSTANDS AND AGREES THAT NEITHER CCC NOR THE RIGHTSHOLDER MAY HAVE SUCH ADDITIONAL RIGHTS TO GRANT.

7. Effect of Breach. Any failure by User to pay any amount when due, or any use by User of a Work beyond the scope of the license set forth in the Order Confirmation and/or these terms and conditions, shall be a material breach of the license created by the Order Confirmation and these terms and conditions. Any breach not cured within 30 days of written notice thereof shall result in immediate termination of such license without further notice. Any unauthorized (but licensable) use of a Work that is terminated immediately upon notice thereof may be liquidated by payment of the Rightsholder's ordinary license price therefor; any unauthorized (and unlicensable) use that is not terminated immediately for any reason (including, for example, because materials containing the Work cannot reasonably be recalled) will be subject to all remedies available at law or in equity, but in no event to a payment of less than three times the Rightsholder's ordinary license price for the most closely analogous licensable use plus Rightsholder's and/or CCC's costs and expenses incurred in collecting such payment.

#### 8. Miscellaneous.

8.1 User acknowledges that CCC may, from time to time, make changes or additions to the Service or to these terms and conditions, and CCC reserves the right to send notice to the User by electronic mail or otherwise for the purposes of notifying User of such changes or additions; provided that any such changes or additions shall not apply to permissions already secured and paid for.

8.2 Use of User-related information collected through the Service is governed by CCC's privacy policy, available online here: <http://www.copyright.com/content/cc3/en/tools/footer/privacypolicy.html>.

8.3 The licensing transaction described in the Order Confirmation is personal to User. Therefore, User may not assign or transfer to any other person (whether a natural person or an organization of any kind) the license created by the Order Confirmation and these terms and conditions or any rights granted hereunder; provided, however, that User may assign such license in its entirety on written notice to CCC in the event of a transfer of all or substantially all of User's rights in the new material which includes the Work(s) licensed under this Service.

8.4 No amendment or waiver of any terms is binding unless set forth in writing and signed by the parties. The Rightsholder and CCC hereby object to any terms contained in any writing prepared by the User or its principals, employees, agents or affiliates and purporting to govern or otherwise relate to the licensing transaction described in the Order Confirmation, which terms are in any way inconsistent with any terms set forth in the Order Confirmation and/or in these terms and conditions or CCC's standard operating procedures, whether such writing is prepared prior to, simultaneously with or subsequent to the Order Confirmation, and whether such writing appears on a copy of the Order Confirmation or in a separate instrument.

8.5 The licensing transaction described in the Order Confirmation document shall be governed by and construed under the law of the State of New York, USA, without regard to the principles thereof of conflicts of law. Any case, controversy, suit, action, or proceeding arising out of, in connection with, or related to such licensing transaction shall be brought, at CCC's sole discretion, in any federal or state court located in the County of New York, State of New York, USA, or in any federal or state court whose geographical jurisdiction covers the location of the Rightsholder set forth in the Order Confirmation. The parties expressly submit to the personal jurisdiction and venue of each such federal or state court. If you have any comments or questions about the Service or Copyright Clearance Center, please contact us at 978-750-8400 or send an e-mail to [info@copyright.com](mailto:info@copyright.com).

|  |
|--|
|  |
|  |

Close

**Confirmation Number: 11674757**

**Citation Information**

**Order Detail ID: 70738313**

**JOURNAL OF CLINICAL INVESTIGATION. ONLINE by AMERICAN SOCIETY FOR CLINICAL INVESTIGATION.  
Reproduced with permission of AMERICAN SOCIETY FOR CLINICAL INVESTIGATION in the format Republish in a  
journal/magazine via Copyright Clearance Center.**

Close

Figure 6

**Dell'Italia, Louis J**

---

**From:** PNAS Permissions <PNASPermissions@nas.edu>  
**Sent:** Friday, September 01, 2017 11:11 AM  
**To:** Dell'Italia, Louis J  
**Subject:** RE: Permission Request

Permission is granted for your use of the figure as described in your message. Please list a full citation for the PNAS article when re-using the material. Because this material published after 2008, a copyright note is not needed. There is no charge for this material, either. Let us know if you have any questions.

Best regards,  
Kay McLaughlin for  
Diane Sullenberger  
Executive Editor  
PNAS

**From:** Dell'Italia, Louis J [<mailto:ldellitalia@uabmc.edu>]  
**Sent:** Tuesday, August 29, 2017 11:29 AM  
**To:** PNAS Permissions  
**Subject:** Permission Request

Dear Editor,

Please accept this request for permission to use the figure 3 from the PNAS publication below.

It will be used in a review entitled: *Multifunctional Roles of Chymase in Acute and Chronic Tissue Injury and Remodeling* to be published in *Circulation Research*.

Thank you so much .

Louis J Dell'Italia, MD  
Professor of Medicine, Cell Developmental and Integrative Biology and Pathology  
Associate Chief of Staff for Research BVAMC  
Elmer and Glenda Harris Chair in Cardiovascular Disease

1. Your full name, affiliation, and title: Louis J Dell'Italia, MD Professor of Medicine, Pathology, Cell and Integrative Biology, University of Alabama at Birmingham
2. Your complete mailing address, phone number, and email: 901 19<sup>th</sup> Street South BMR II 434 Birmingham, AL 35294
3. PNAS volume number, issue number, and issue date: *Proc Natl Acad Sci U S A.* 2011;108(36):14849-14854.
4. PNAS article title: Identification and characterization of a functional mitochondrial angiotensin system.
5. PNAS authors' names: Abadir PM, Foster DB, Crow M, Cooke CA, Rucker JJ, Jain A, Smith BJ, Burks TN, Cohn RD, Fedarko NS, Carey RM, O'Rourke B, Walston JD.
6. Page numbers of items to be reprinted: page 14851
7. Figure/table number or portion of text to be reprinted: Figure 3

Requests must also include the following information about the intended use of the material:

1. Title of work in which PNAS material will appear: *Multifunctional Roles of Chymase in Acute and Chronic Tissue Injury and Remodeling*.
2. Authors/editors of work: Louis J Dell'Italia, James F Collawn, Carlos M Ferrario
3. Publisher of work: *Circulation Research*, American Heart Association
4. Retail price of work
5. Number of copies of work to be produced

6. Intended audience: Cardiovascular Scientific and Clinical Community
7. Whether work is for nonprofit or commercial use: No
